# Supplementary material
Source: PubMed Central journal article supplement (PMC4936581)
Supplement: supp_pp.16.00532_PP2016-00532DR1_Supplemental_Materialfigsmovielegends.pdf [file supp_pp.16.00532_PP2016-00532DR1_Supplemental_Materialfigsmovielegends.pdf]

1 **Supplementary data**

2

3

4

5

6

7 **VIPP1 has a disordered C-terminal tail necessary for protecting photosynthetic**  
8 **membranes against stress in *Arabidopsis***

9

10

11

12 Lingang Zhang, Hideki Kondo, Hironari Kamikubo, Mikio Kataoka and Wataru  
13 Sakamoto

14

15

16 Institute of Plant Science and Resources, Okayama University, Kurashiki, Okayama  
17 710-0046, Japan (L.Z., H.Ko., W.S.), School of Life Science and Technology, Inner  
18 Mongolia University of Science and Technology, Baotou 014010, China (L.Z.),  
19 Graduate School of Materials Science, Nara Institute of Science and Technology,  
20 Ikoma, Nara 630-0101, Japan (H.Ka, M.K.)

21

22 **Supplementary movie legends:**

23

24

25 **Supplementary Movie 1.** VIPP1-GFP particles showing movement when chloroplasts  
26 isolated from *VIPP1-GFP/Col* underwent 20% hypotonic stress (equivalent to 0.56  
27 osmol/L). Recoding time, 5 sec.

28

29

30 **Supplementary Movie 2.** VIPP1-GFP particles showing movement when leaf tissue  
31 from *VIPP1-GFP/Col* infiltrated with water. Recording time, 7 sec.

32

33

34 **Supplementary Movie 3.** Small VIPP1-GFP particles began to move when the  
35 mesophyll protoplast of *VIPP1-GFP/Col* underwent 20% hypotonic stress  
36 (equivalent to 0.56 osmol/L). Recording time, 4 sec.

37

38

39 **Supplementary Movie 4.** Several small VIPP1 $\Delta$ c-GFP particles began to move when  
40 the mesophyll protoplast of *VIPP1 $\Delta$ c-GFP/Col* underwent 20% hypotonic stress  
41 (equivalent to 0.56 osmol/L). Recording time, 4 sec.

42

43

44

45 **Supplementary Movie 5.** Some slightly larger VIPP1-GFP particles of *VIPP1-*  
46 *GFP/Col* start moving in the chloroplast of mesophyll protoplast in the condition of  
47 50% hypotonic stress (equivalent to 0.35 osmol/L). Recording time, 4 sec.

48

49

50

51 **Supplementary Movie 6.** Some slightly larger VIPP1 $\Delta$ c-GFP particles of *VIPP1 $\Delta$ c-*  
52 *GFP/Col* start moving in the chloroplast of mesophyll protoplast in the condition of  
53 50% hypotonic stress (equivalent to 0.35 osmol/L). Recording time, 4 sec.

54

55

56

57 **Supplementary Movie 7.** VIPP1-GFP remained static in the chloroplast of mesophyll  
58 protoplast without hypotonic stress (equivalent to 0.70 osmol/L). Recording time, 4  
59 sec.

60

61

62

63 **Supplementary Movie 8.** No movement was observed with VIPP1 $\Delta$ c-GFP particles in  
64 the chloroplast of mesophyll protoplast without hypotonic stress (equivalent to 0.70  
65 osmol/L). Recording time, 4 sec.

66

67

68

69  
70  
71

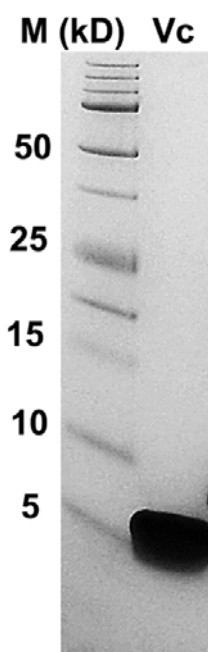

72  
73  
74  
75  
76

**Supplementary Fig. S1** SDS PAGE of synthesized Vc (38 aa).

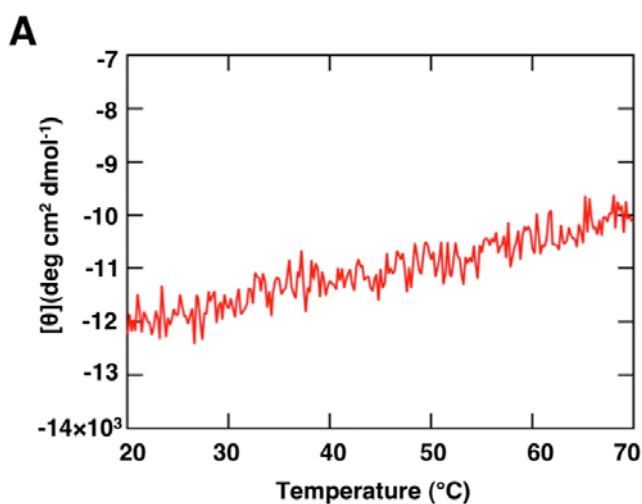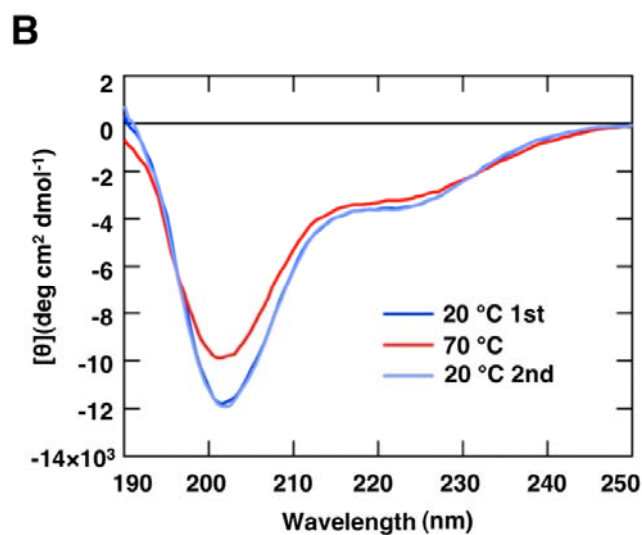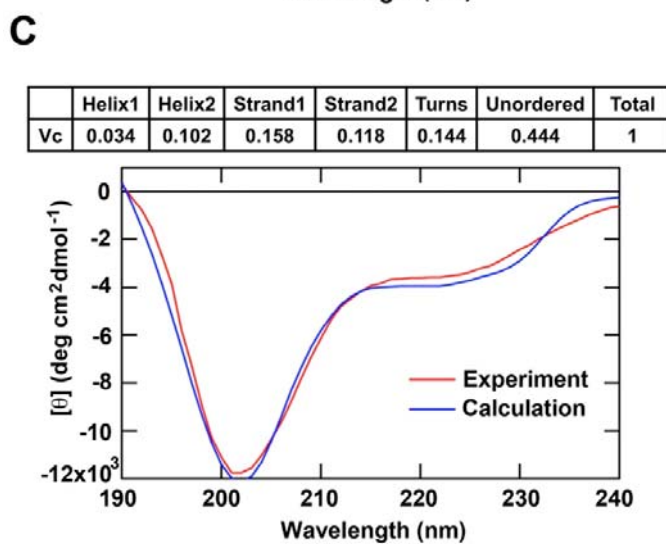

### Supplementary Fig. S2

CD analysis of the synthesized Vc.

(A) Thermal stability of synthesized Vc monitored upon increased temperature at 202 nm of the CD spectrum.

(B) Reversibility of CD spectra measured in denatured (70 °C, red) and room temperature (20 °C, blue) conditions.

(C) Secondary structure composition of Vc estimated from the CD spectra shown in Figure 1C using online CD analysis site, DichroWeb (<http://dichroweb.cryst.bbk.ac.uk>). Upper table illustrates the secondary structure composition of Vc. Helix1,

Helix2, Strand1 and Strand2 indicate a regular  $\alpha$ -helix, disordered  $\alpha$ -helix, regular  $\beta$ -strand and disordered  $\beta$ -strand, respectively. Lower graph shows the calculation result.

109  
110

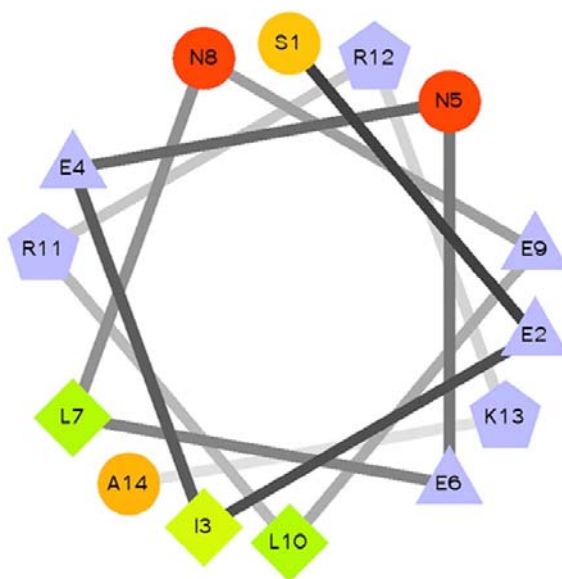

111  
112  
113  
114  
115  
116  
117  
118

**Supplementary Fig. S3** Helical wheel projection of Vc.

The hydrophobic amino acid is shown with green. Hydrophilic residues are coded red.

The prediction was conducted using online software

(<http://rzlab.ucr.edu/scripts/wheel/wheel.cgi>).

119  
120  
121

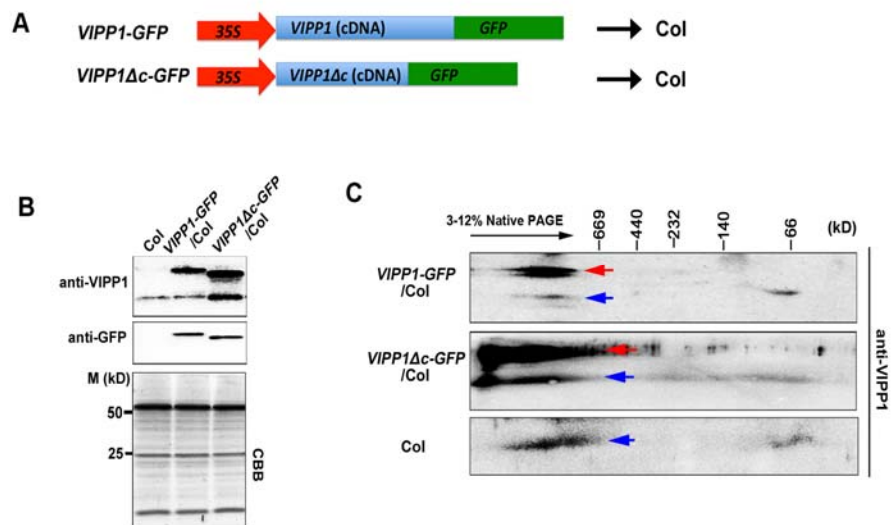

122  
123  
124

125 **Supplementary Fig. S4** Overexpression of *VIPP1-GFP* and *VIPP1Δc-GFP* in  
126 *Arabidopsis*.

127 (A) Schematic illustration of *VIPP1-GFP* and *VIPP1Δc-GFP* constructs used for  
128 transformation into Col.

129 (B) Accumulation of *VIPP1-GFP* and *VIPP1Δc-GFP* in the overexpression lines  
130 confirmed by Western blots.

131 (C) Analysis of *VIPP1*, *VIPP1-GFP* and *VIPP1Δc-GFP* supercomplexes with Native  
132 PAGE. 3-12% Native PAGE was used to separate chloroplast proteins of Col, *VIPP1-*  
133 *GFP*/Col and *VIPP1Δc-GFP*/Col isolated as described in Supplemental Methods. Blue  
134 arrowhead indicated *VIPP1* supercomplexes of different lines. Red arrowhead marked  
135 the supercomplexes of *VIPP1-GFP* (upper panel) and *VIPP1Δc-GFP* (middle panel),  
136 respectively.

137

138

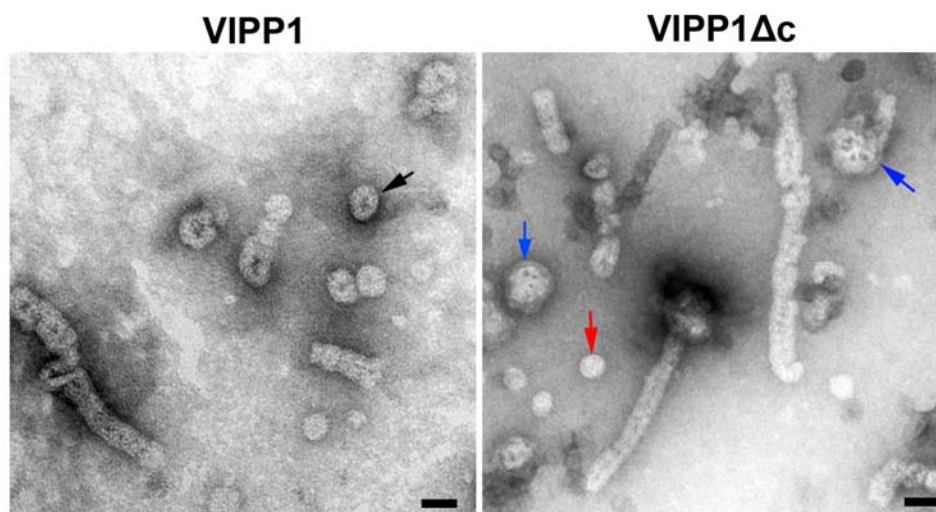

139

140

141 **Supplementary Figure S5** Negative stain and TEM observation of VIPP1 and  
142 VIPP1Δc in Tris buffer. Recombinant VIPP1 and VIPP1Δc expressed and purified from  
143 *E. coli* in Tris buffer were visualized using negative stain and subsequent observation  
144 by TEM. Bars = 40 nm. A typical FVP observed in VIPP1 and VIPP1Δc is indicated by  
145 black or red arrow, respectively, and variable VIPP1Δc aggregates that look different  
146 from those in VIPP1 are indicated by blue arrows.

147

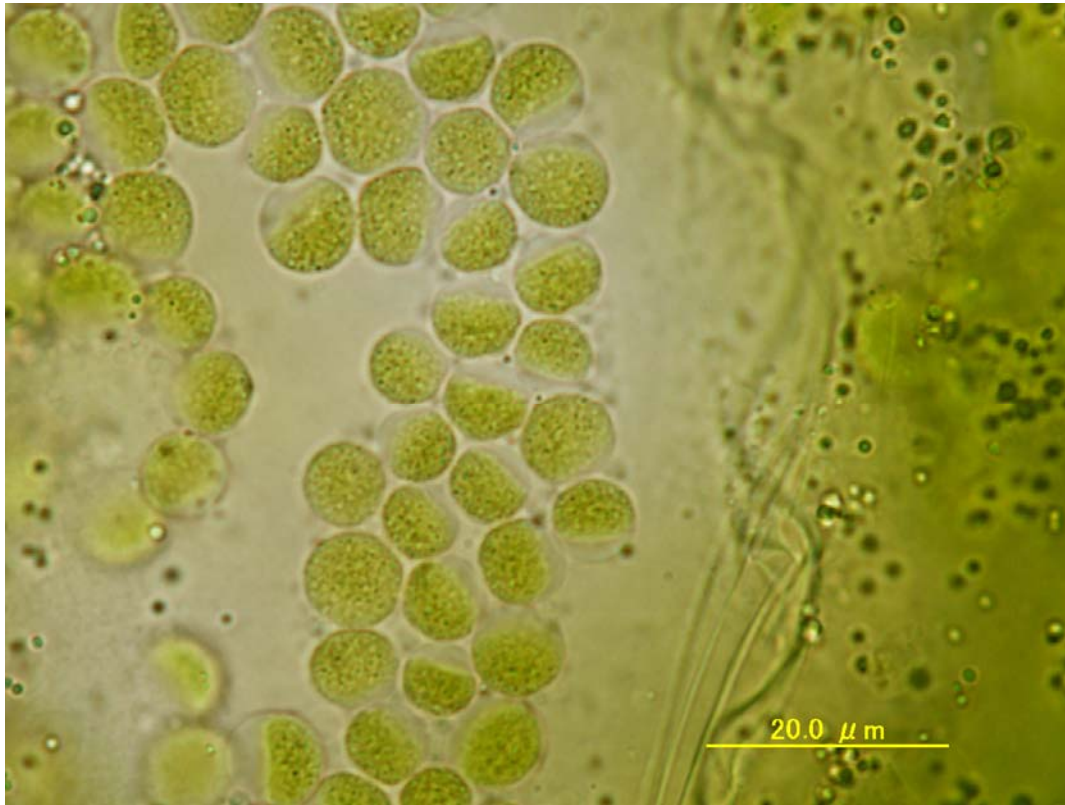

148

149

150 **Supplementary Figure S6** Bright-field still image of the chloroplasts shown in

151 Supplementary Movie 2.



152

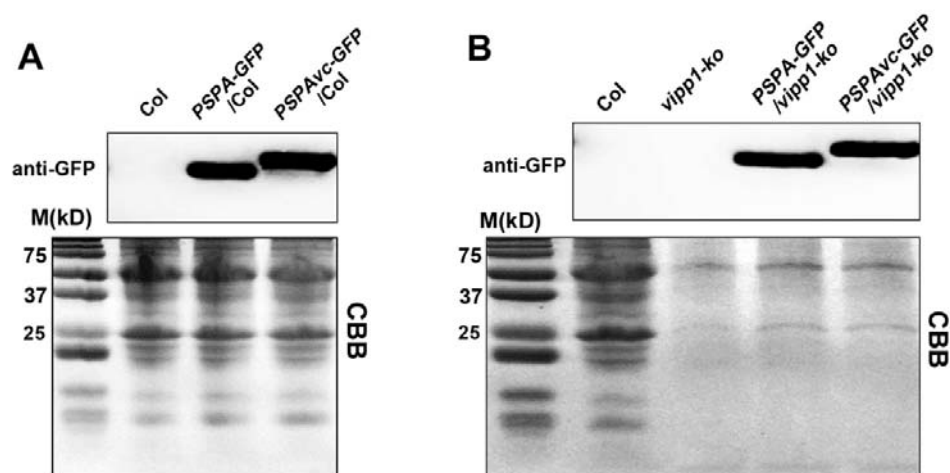

153

154

155 **Supplementary Fig. S7** Immunoblot detection of PSPA-GFP and PSPAvc-GFP in  
156 *PSPA-GFP/Col*, *PSPAvc-GFP/Col*, *PSPA-GFP/vipp1-ko*, and *PSPAvc-GFP/vipp1-ko*.  
157 (A) Total leaf protein extracts from Col, *PSPA-GFP/Col*, *PSPAvc-GFP/Col* (normalized  
158 based on fresh weight) were probed with anti-GFP antibodies (upper panel). Lower  
159 panel indicates CBB-stained SDS-PAGE gel of the same proteins. Molecular size  
160 markers (M) are shown on the left.  
161 (B) Total leaf protein extracts from Col, *vipp1-ko*, *PSPA-GFP/vipp1-ko*, and *PSPAvc-*  
162 *GFP/vipp1-ko* (normalized based on fresh weight) were probed with anti-GFP  
163 antibodies (upper panel). Lower panel indicates CBB-stained SDS-PAGE gel of the  
164 same proteins. Molecular size markers (M) are shown on the left.  
165

166  
167  
168  
169

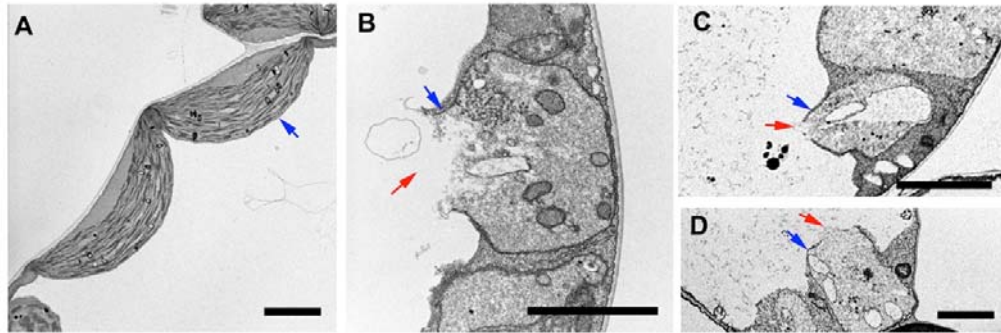

170  
171  
172  
173  
174  
175  
176  
177  
178

**Supplementary Fig. S8** Broken chloroplast/plastids of *vipp1* mutants under transmission electron microscopy (TEM). Chloroplast ultrastructure of Col (A), *vipp1-kd* (B) and *vipp1-ko* (C and D) seedlings was examined with TEM. The chloroplast envelope was indicated by blue arrowheads. Damaged sites of chloroplast envelope were marked by red arrowheads. Bars = 2  $\mu\text{m}$ .
